# Supplementary material for: Enhanced visible light photocatalytic water-splitting activity over LaVO4/g-C3N4 with oxygen defects
Source: Royal Society of Chemistry journal article supplement (doi:10.1039/d1nj02952e), 2021-01-01
Supplement: d1nj02952e1.pdf [file d1nj02952e1.pdf]

## Supporting Information

### The enhanced visible light photocatalytic water-splitting activity over LaVO<sub>4</sub>/g-C<sub>3</sub>N<sub>4</sub> with oxygen defect

Xuecheng Liu<sup>1,2\*</sup>, Ling Gao<sup>2</sup>, Gaoxiang Qi<sup>1,2</sup>, Jie Zhang<sup>2\*</sup>, Biyan Liu<sup>3</sup>, Yucheng Chen<sup>1</sup>

<sup>1</sup>College of Resources and Environment, Southwest University, Chongqing 400715, China

<sup>2</sup>College of Environment and Resources, Chongqing Technology and Business University, Chongqing 400067, China

<sup>3</sup>Chongqing Feearth Environmental Technology Co.,Ltd., Chongqing 400000, China

\*Correspondence:

Xuecheng Liu (E-mail: [liuxc@ctbu.edu.cn](mailto:liuxc@ctbu.edu.cn)); Jie Zhang ([lang19880107@hotmail.com](mailto:lang19880107@hotmail.com))

#### Sample characterization.

The X-ray diffractometer (XRD) (modelD/max RA,RigakuCo., Japan) was carried out to analyze the crystalline phases of the prepared materials with CuK $\alpha$  radiation. The surface properties were investigated by using XPS (X-Ray photoelectron spectroscopy, Thermo ESCALAB 250, USA) with Al Ka X-rays radiation. The morphology was observed by a transmission electron microscope (TEM, JEM-6700F, Japan). Ultraviolet-visible (UV-Vis, UV-2700, Japan) absorption spectra was measured by a UV-Visible spectrometer. Photoluminescence spectra (PL, FS-2500, Japan) was investigated by using a fluorescence spectrometer equipped with the Xe lamp. The photoelectric current (PC) and electrochemistry impedance spectroscopy (EIS) response were measured by an electrochemical workstation (CHI660E, China). The prepared photocatalytic material was coated onto the FTO glass electrode for the working electrode. Platinum foil was used for the counter electrode, and Ag/AgCl was prepared as the reference electrode in 0.1 M Na<sub>2</sub>SO<sub>4</sub> aqueous solution. The photocurrent was measured at a bias voltage of 0.02 V and the frequency range was from 0.01 Hz to 100 kHz under 40 s light on/off cycles of chopped illumination with a

Xe arc lamp.

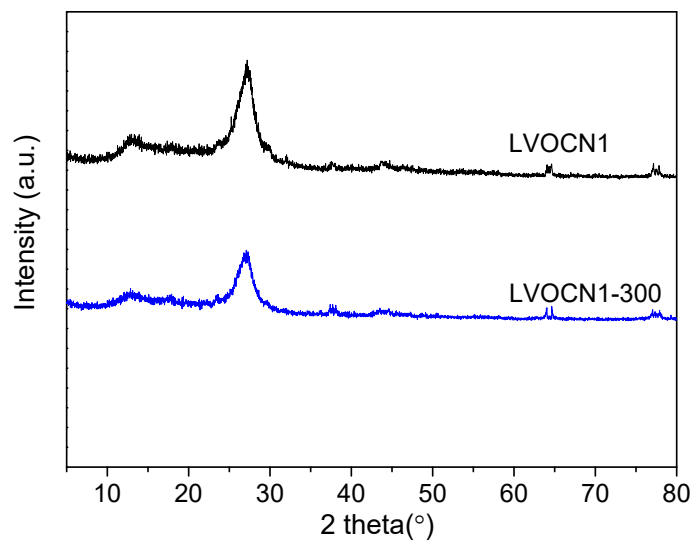

Figure S1 XRD patterns of LaVOCN1 and LaVOCN1-300.

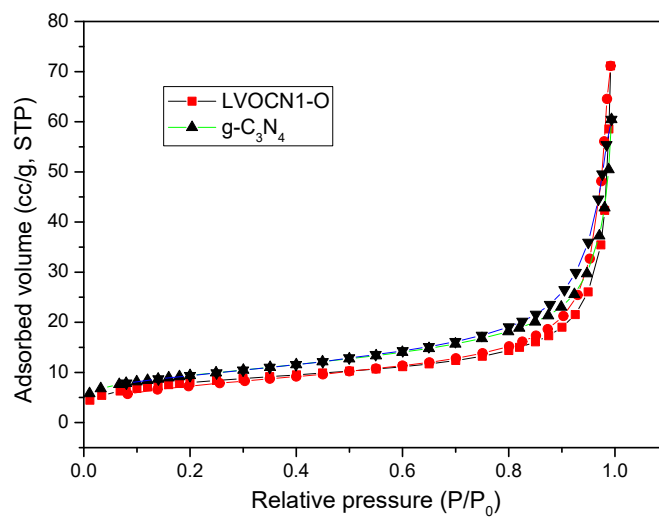

Figure S2 the N<sub>2</sub> adsorption/desorption isotherms of g-C<sub>3</sub>N<sub>4</sub> and LVOCN1-O.

Table S1. Atomic relative content (%) of prepared samples from XPS characterization

| Sample | g-C <sub>3</sub> N <sub>4</sub> | LaVOCN1 | LaVOCN1-300 |
|--------|---------------------------------|---------|-------------|
| N      | 52.66                           | 43.93   | 44.34       |
| C      | 44.28                           | 51.64   | 51.02       |
| O      | 3.05                            | 4.37    | 4.12        |

|    |   |      |      |
|----|---|------|------|
| La | - | 0.01 | 0.01 |
| V  | - | 0.05 | 0.51 |

Table S2. Binding energy (BE) and relative content (RC) of C 1s for prepared samples

| sample            | g-C <sub>3</sub> N <sub>4</sub> |       | LVOCN1 |       | LVOCN1-300 |       |
|-------------------|---------------------------------|-------|--------|-------|------------|-------|
|                   | BE(eV)                          | RC(%) | BE(eV) | RC(%) | BE(eV)     | RC(%) |
| C-C               | 284.8                           | 19.93 | 284.8  | 36.35 | 284.8      | 27.50 |
| N=C-N             | 288.1                           | 74.32 | 288.3  | 57.83 | 288.2      | 66.66 |
| $\pi$ -excitation | 293.9                           | 5.75  | 294.5  | 5.82  | 294.2      | 5.84  |

Table S3. Binding energy (BE) and relative content (RC) of N 1s for prepared samples

| sample           | g-C <sub>3</sub> N <sub>4</sub> |       | LVOCN1 |       | LVOCN1-300 |       |
|------------------|---------------------------------|-------|--------|-------|------------|-------|
|                  | BE(eV)                          | RC(%) | BE(eV) | RC(%) | BE(eV)     | RC(%) |
| N=C-N            | 398.6                           | 62.73 | 398.6  | 43.30 | 398.4      | 41.02 |
| N doping         | 399.2                           | 21.10 | 399.2  | 32.88 | 399.1      | 32.11 |
| amino function   | 400.6                           | 14.84 | 400.6  | 18.78 | 400.6      | 17.68 |
| charging effects | 404.5                           | 1.33  | 405.0  | 5.04  | 404.5      | 9.18  |

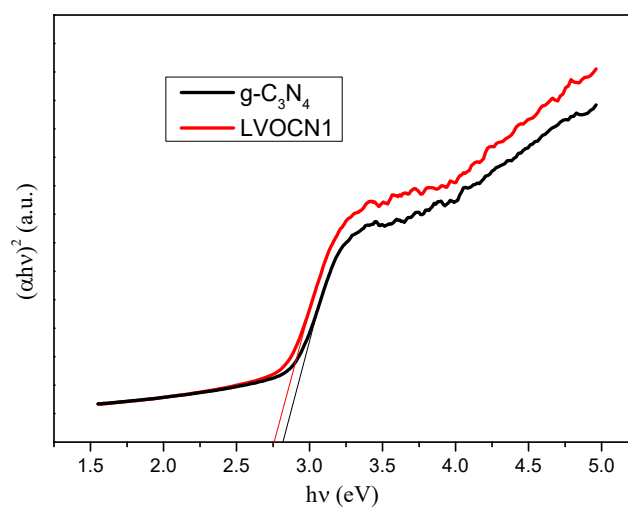

Figure S3 Plots of  $(\alpha h\nu)^2$  versus photon energy ( $h\nu$ ) for the band gap energies of g-  
 $C_3N_4$  and LVOCN1.
